# Supplementary material
Source: PubMed Central journal article supplement (PMC5709238)
Supplement: NIHMS880952-supplement-Supplemental_Tables.pdf [file NIHMS880952-supplement-Supplemental_Tables.pdf]

Supplemental Table 1. Characteristics of Participating Sites

| Site         | Site Type                                         | Census Region                         | Patient Cohort Included Members of a Special Population <sup>a</sup> | Data Collection Tier <sup>b</sup> | Patients Discontinuing Treatment (%) |
|--------------|---------------------------------------------------|---------------------------------------|----------------------------------------------------------------------|-----------------------------------|--------------------------------------|
| A            | State health department                           | South                                 | Homeless                                                             | Comprehensive                     | 15.1                                 |
| B            | Correctional facility                             | Northeast<br>Midwest<br>South<br>West | Corrections                                                          | Basic                             | 5.5                                  |
| C            | Mixed                                             | West                                  | Corrections, students                                                | Standard                          | 8.3                                  |
| D            | State health department                           | Northeast                             | Corrections, students                                                | Standard                          | 13.3                                 |
| E            | County health departments                         | South                                 | Homeless, children                                                   | Basic                             | 17.5                                 |
| F            | City health department                            | West                                  |                                                                      | Standard                          | 15.0                                 |
| G            | County health department                          | Midwest                               | Homeless                                                             | Basic                             | 3.3                                  |
| H            | State health department, university health clinic | Midwest                               | Students                                                             | Comprehensive                     | 9.3                                  |
| I            | University health clinic                          | Midwest                               |                                                                      | Standard                          | 12.5                                 |
| J            | State health department                           | South                                 | Homeless, children                                                   | Comprehensive                     | 16.1                                 |
| K            | Health department                                 | West                                  |                                                                      | Comprehensive                     | 9.8                                  |
| L            | County health departments                         | West                                  |                                                                      | Comprehensive                     | 19.2                                 |
| M            | Hospital                                          | Midwest                               | Children                                                             | Basic                             | 0.0                                  |
| N            | City health department                            | Midwest                               |                                                                      | Basic                             | 11.8                                 |
| O            | State health department                           | South                                 |                                                                      | Comprehensive                     | 9.0                                  |
| P            | State health department                           | South                                 |                                                                      | Basic                             | 8.7                                  |
| <b>Total</b> |                                                   |                                       |                                                                      |                                   | <b>421 of 3288 (12.8)</b>            |

<sup>a</sup> Certain site populations included patients of particular interest for treatment with 3HP because the completion rates with daily isoniazid are historically low.

<sup>b</sup> Data collection tiers: basic tier data included patient demographics, weekly dose and ADRs, and final disposition; standard tier data included basic tier data plus certain medical and

population risk factors for TB and concomitant medications of specific medication classes;  
comprehensive tier data included all data collected in the standard tier plus additional patient  
medications and medical conditions.

Supplemental Table 2. Summary of Outcomes of 3HP Treatment (n=3288)

| Final Disposition                                                                                                | No. (%)      |
|------------------------------------------------------------------------------------------------------------------|--------------|
| Patient completed treatment without interruption                                                                 | 2,793 (84.9) |
| Patient temporary halted due to adverse drug reaction (ADRs) or other cause but subsequently completed treatment | 74 (2.3)     |
| Patient discontinued 3HP and switched to an alternate regimen <sup>a</sup> (ie, 9H, 6H, or 4R)                   | 115 (3.5)    |
| Patient discontinued because of ADR or adverse event and stopped all LTBI treatment <sup>b</sup>                 | 131 (4.0)    |
| Discontinuation as a result of loss to follow-up or refusal <sup>c</sup>                                         | 175 (5.3)    |

Abbreviations: 3HP, 3-month regimen of once-weekly isoniazid and rifapentine directly supervised; LTBI, latent TB infection

<sup>a</sup> Alternate regimens included a 9-month regimen of daily isoniazid (9H), a 6-month regimen of daily isoniazid (6H), and a 4-month regimen of daily rifampin (4R).

<sup>b</sup> Final disposition data indicated patient stopped because of adverse event or ADR(s); for certain patients no additional information was provided and the patient was presumed to have stopped all LTBI treatment.

<sup>c</sup> Loss to follow-up included patients who did not return for scheduled directly observed therapy visits, moved out of the site catchment area, moved out of state, were released from a corrections facility, transferred to another school, or refused to continue treatment.
